1           The concentration of several perfluoroalkyl acids in serum appears to be reduced by dietary fiber

2

3                           Michael W. Dzierlenga<sup>a,\*</sup>, Debra R. Keast<sup>b</sup>, Matthew P. Longnecker<sup>a</sup>

4

5           <sup>a</sup> Ramboll US Consulting, Inc., Raleigh, NC, USA

6           <sup>b</sup> Food & Nutrition Database Research, Inc., Bangor, PA, USA

7           \* Corresponding author at: 3214 Charles B. Root Wynd, Suite 130, Raleigh, NC 27612, USA. E-mail  
8                           address: [mdzierlenga@ramboll.com](mailto:mdzierlenga@ramboll.com) (M.W. Dzierlenga).

9

10 Abstract

11 Fiber-rich food intake has been associated with lower serum concentrations of perfluoroalkyl substances  
12 (PFAS) in some studies and dietary fiber was related to lower serum PFAS in a recent study. Given the  
13 previous epidemiologic data suggesting that fiber might decrease serum PFAS concentrations, we  
14 examined the relation of serum PFAS concentrations to intake of dietary fiber in National Health and  
15 Nutrition Examination Survey (NHANES) data. We examined the PFAS-fiber association among 6,482  
16 adults who participated in the NHANES, 2005-2016. Fiber intake was estimated based on two 24-hour  
17 diet recalls. We adjusted the models for determinants of PFAS and potentially confounding factors such  
18 as intake of foods reported to increase PFAS exposure. Results were expressed as the percent difference  
19 in PFAS concentration per interquartile range (IQR) increase in fiber (and 95 percent confidence  
20 interval), and the NHANES sampling parameters were used to make the results generalizable to the U.S.  
21 The adjusted percent difference in perfluorooctanoic acid (PFOA) per IQR increase in fiber was -3.64 (-  
22 6.15, -1.07); for perfluorooctane sulfonic acid (PFOS) was -6.69 (-9.57, -3.73), and for perfluorononanoic  
23 acid (PFNA) was -8.36 (-11.33, -5.29). These results suggest that dietary fiber increases the  
24 gastrointestinal excretion of PFOA, PFOS, and PFNA. Because fiber also lowers serum cholesterol, in  
25 some studies of the serum cholesterol-PFAS relationship confounding by fiber may be worth evaluating.

26

27 Keywords: Perfluorinated alkyl substances, Fluorocarbons, Pharmacokinetics, Dietary Fiber, Nutrition  
28 Surveys

29 *Introduction*

30 Perfluorinated alkyl substances (PFAS) have been associated with a number of health outcomes  
31 in humans, even when the exposure was below that found to have an effect in animals (EPA 2016a; EPA  
32 2016b; EFSA 2018). A prime example is increased serum cholesterol (Steenland et al., 2009). In a recent  
33 report based on the National Health and Nutrition Examination Survey (NHANES), the cholesterol-PFAS  
34 association was 1.5 mg/dl per ng/ml of perfluorooctanoic acid (PFOA) in serum (Dong et al., 2019).  
35 Confounding is a plausible explanation for an association of such modest size. Given the paucity of  
36 animal data supporting adverse effects of PFAS on cholesterol at background levels of exposure, a natural  
37 question to ask was: could there be an as-yet-unidentified confounding factor that might explain this  
38 relationship? We identified consumption of dietary fiber as a possible source of confounding, as it has a  
39 well-known inverse association with cholesterol and may decrease PFAS levels through increases in  
40 gastrointestinal excretion.

41 Dietary fiber decreases absorption of several constituents of food such as cholesterol, fat, and iron  
42 (Grube et al., 2013; Hallberg and Hulthén, 2000; Jesch and Carr, 2017). Fiber also decreases the  
43 absorption of bile acids which contributes to its serum-cholesterol-lowering effect (Brown et al., 1999;  
44 Ellegård and Andersson, 2007). Dietary fiber decreases absorption by adsorbing substances or trapping  
45 them in viscous gel matrix (Naumann et al., 2019). Fiber-rich food intake has been associated with lower  
46 serum PFAS concentration in some studies (Halldorsson et al., 2008; Skuladottir et al., 2015) and dietary  
47 fiber was related to lower serum PFAS in a recent study (Lin et al., 2020: Supplementary Material Figure  
48 S4).

49 PFAS were used or have ongoing use in manufacturing of a variety of products, including  
50 consumer-use products (Buck et al., 2011; Interstate Technology Regulatory Council (ITRC), 2020).  
51 Almost everyone in developed countries has detectable amounts of PFAS in their serum, due to exposure  
52 via contaminated food and other sources (Sunderland et al., 2019). The association of human health  
53 outcomes with PFAS have been, in some cases, used as the critical endpoint in risk assessments, even

54 when the epidemiologic results were from populations with background-level exposure (EFSA CONTAM  
55 Panel, 2020, 2018).

56         Given the previous epidemiologic data suggesting that fiber might decrease serum PFAS  
57 concentrations and the possibility that a PFAS-fiber association might confound the results of studies on  
58 health outcomes and PFAS, we examined the relation of serum PFAS concentrations to intake of dietary  
59 fiber in NHANES data. The NHANES now has more than 10 years' worth of data on serum PFAS  
60 concentrations among subjects with two 24-hour diet recalls (Centers for Disease Control and Prevention  
61 (CDC) National Center for Health Statistics (NCHS), 2015).

## 62 **Methods**

### 63 *Study population*

64         Data on NHANES participants from the 2005-2006 through 2015-2016 waves were used.  
65 Because the food frequency questions about fish consumption were asked only of women of reproductive  
66 age in 2003-2004, that NHANES wave was not included. (Earlier waves had only one 24-hour diet recall  
67 per subject.) Participants were included in the main analysis if they had complete dietary data,  
68 measurement of PFAS levels, and data for all other covariates (see *other covariates* below). Participants  
69 who reported using bile acid sequestrants were excluded as these drugs may interfere with absorption of  
70 PFAS from the gut (Genuis et al., 2010). Participants were also excluded if they were under 20 or over 79  
71 years old, if they were pregnant, if they were breastfeeding, or if they were undergoing dialysis.

### 72 *PFAS Levels*

73 PFOA, perfluorosulfonic acid (PFOS), and perfluorononanoic acid (PFNA) were measured in all the  
74 waves from 2005-2006 through 2015-2016. We selected PFOA, PFOS and PFNA as the PFAS to  
75 examine based on the high proportion of participants with detectable levels of those compounds in human  
76 serum (>99%) and the tendency for the levels of those chemicals to be associated with cholesterol levels  
77 in serum (Dong et al., 2019; Geiger et al., 2014; Nelson et al., 2010; Steenland et al., 2009). PFAS were  
78 quantified in a subsample of one third of the NHANES participants. For waves from 2013-2014 and  
79 2015-2016, in which the linear and branched isomers of PFOA and PFOS were measured separately, we

80 used the sum of the linear and branched isomers. As mentioned previously, the three chemicals were  
81 measured at levels above the limit of detection (LOD) in most participants, with the exception of the  
82 branched isomer of PFOA, which was below the LOD in most of the participants in which the isomers of  
83 PFOA were separately measured. Measurements of levels below the LOD were imputed with  
84 LOD/sqrt(2). The sum of PFOA was mostly determined by the linear isomer, with a mean ratio of linear  
85 to branched PFOA of 25.8.

### 86 *Dietary Information*

87 The dietary survey portion of NHANES consisted of two 24-hr diet recalls, and a targeted food  
88 frequency questionnaire covering fish and seafood consumption within the last 30 days. Based on the  
89 consumed amount of individual foods reported in the 24-hr recalls, nutrient intakes were derived using the  
90 NHANES wave-specific Food and Nutrient Database for Dietary Studies (Food Surveys Research Group,  
91 Agricultural Research Service, USDA, 2018). Total dietary fiber was the fiber remaining after a food's  
92 digestion by  $\alpha$ -amylase, protease, and amyloglucosidase (Lee et al., 1992).

93 Foods that have been reported to contain high levels of PFAS (Domingo et al., 2012; Ericson et  
94 al., 2008; Haug et al., 2010; Noorlander et al., 2011; Tittlemier et al., 2007; Vestergren and Cousins,  
95 2013), or whose consumption has been associated with higher PFAS levels (Arrebola et al., 2018;  
96 Averina et al., 2018; Brantsaeter et al., 2013; Eriksen et al., 2011; Jain, 2014; Liu et al., 2017; Park et al.,  
97 2019; Skuladottir et al., 2015; Zhou et al., 2019) were considered as potentially confounding factors: fish  
98 and seafood, meat and meat products, milk and dairy products, eggs and egg products, and popcorn. For  
99 fish and seafood, adjustment was based on the number of reported times fish and seafood were eaten in  
100 the past 30 days. For the other food categories, adjustment was based on the grams/d of each food  
101 category consumed, averaged over the two 24-hr recalls. Details about the classification of food recall  
102 data into food categories are presented in the supplemental information (Table S1). Total energy intake  
103 was also considered as a covariate.

### 104 *Other Covariates*

105 For the adjusted analyses, we adjusted a priori for sex, age, race and ethnicity (5 categories),  
106 NHANES wave, income to poverty ratio, and BMI (kg/m<sup>2</sup>). For women, we also considered adjustment  
107 for parity. We also considered adjustment for cigarette smoking (never [ $<100$  cigarettes lifetime], former  
108 [does not currently smoke cigarettes], smoker [ $<1$  pack per day average last 30 days], heavy smoker [ $\geq 1$   
109 pack per day average last 30 days]), and alcohol intake (never [ $<12$  drinks lifetime], former [0 drinks last  
110 12 mo.], light drinker [ $<1$  drink per week last 12 mo.], drinker [ $<7$  drinks per week last 12 mo.], heavy  
111 drinker [ $\geq 7$  drinks per week last year]). These covariates were chosen based on their possible influence on  
112 diet composition, energy intake, dietary fiber, or serum PFAS level (Figure S1).

### 113 *Statistical Methods*

114 Univariate distributions were analyzed using median and quartiles for continuous variables and  
115 by percentage for categorical variables. In a preliminary step, energy-intake-adjusted fiber intake was  
116 calculated as the residual of the regression of dietary fiber on total caloric intake. Energy-intake-  
117 adjustment produces a variable which represents dietary intake from a relative and not absolute  
118 perspective (Willett et al., 1997). Energy-adjusted fiber residuals reflect variation in diet composition,  
119 whereas crude fiber intakes reflect variation in levels of energy intake and diet composition. The Pearson  
120 correlation of energy intake with crude fiber was 0.53. One advantage of the “residual approach” is that  
121 the IQR of the energy-adjusted residuals more readily corresponds to a realistic difference in diet than  
122 does an IQR difference in crude fiber. Fiber and caloric intake were log-transformed to normalize the  
123 distributions for the regression. As the residuals of the regression were centered at zero, the mean crude  
124 fiber intake was added back to the residuals to produce an easier to interpret metric. The energy-intake  
125 adjustment was done before averaging the two 24-hr dietary recalls. We fit a regression model of log<sub>e</sub>  
126 transformed PFAS with energy-intake-adjusted dietary fiber intake as the key independent variable  
127 (continuous, original scale), with adjustment for the a priori and other factors considered. Dietary and  
128 lifestyle variables were removed in order of smallest impact of their removal on the  $\beta$  for PFAS-fiber,  
129 with the condition that variables were removed such that the modified  $\beta$  varied by less than 5% than the  $\beta$   
130 from the full model. Linear and second order models for fiber were also tested, with the quadratic model

131 selected if the AIC was improved (decreased) by 4 or greater. We also performed regressions with  
132 quartile of energy-intake-adjusted total dietary fiber intake as the independent variable.

133 We also examined effect modification by comparing models with and without interaction terms  
134 for dietary fiber consumption and each confounding variable in the full model. The comparison was  
135 performed using a decrement in  $AIC \geq 4$  indicating a better-fitting model. To see if the PFAS-fiber  
136 association varied by source of fiber we fit models with total fiber replaced by a group of variables  
137 representing fiber intake from specific types of food. Details about the food categories used for this  
138 analysis are in the supplemental information (Table S2). For comparison with the g/d fiber results, we fit  
139 similar models of g/d of food from the categories of fiber-containing foods.

140 In sensitivity analyses, we investigated the possibility of bias due to missing data using multiple  
141 imputation with chained equations (Buuren and Groothuis-Oudshoorn, 2011). We performed the analysis  
142 using fully conditional specification to impute the missing data for the adjustment factors. Five chains  
143 were used for imputation with 25 iterations performed for each chain. Convergence was evaluated by  
144 examining plots of variable mean and standard deviation across chains and iterations.

145 We also fit versions of our models that instead of using energy-adjusted fiber values (and energy  
146 intake for the full model), included crude fiber and energy intake. We also estimated the PFAS-fiber  
147 associations that would have been observed in the absence of measurement error in fiber intake, given  
148 certain assumptions. This is described in the supplemental information (Section 1).

149 All statistical analyses were carried out in R (R Core Team, 2018). In the initial diet calculations,  
150 the 2-day dietary sample weight was used for the 24-hr dietary recall data to account for day-of-the-week  
151 variation and other factors. In the regression models the sampling parameters and survey weights for the  
152 PFAS measurements were used. The R package “survey” was used to perform the regression (Lumley,  
153 2019a, 2004). The R packages “mice” and “mitools” were used to perform and analyze the multiple  
154 imputation (Buuren and Groothuis-Oudshoorn, 2011; Lumley, 2019b).

## 155 **Results**

156           After excluding subjects with incomplete information (Figure S2), data for 6,482 people were  
157 included in the analysis. Most exclusions (more than 1% of the total initial population) were due to age,  
158 lack of outcome measurement, or lack of one or both 24-hr diet recalls. The characteristics of the 6,482  
159 reflected that of the U.S. adult population (Table 1). The median fiber intake was consistent with the  
160 reported U.S. mean of 16 g/d (Hoy and Goldman, 2014), recognizing the slight skewness of the  
161 distribution; the distribution of energy-adjusted fiber was slightly narrower than for the crude distribution,  
162 as expected. Popcorn consumption had 0 g/day for the 75<sup>th</sup> quartile. Further analysis showed that 619  
163 individuals (9.5%) had popcorn intake greater than 0 g/day.



164 **Table 1.** Population characteristics. Number (and percentage) are shown for categorical variables. Median  
 165 (and quartiles) are shown for continuous variables.<sup>a</sup>

| Characteristic                             | Number or Median  |
|--------------------------------------------|-------------------|
| Sample Size                                | 6482              |
| Sex                                        |                   |
| Female                                     | 3260 (50.3%)      |
| Male                                       | 3222 (49.7%)      |
| Age                                        | 47 (34, 58)       |
| Race/Ethnicity                             |                   |
| Mexican American                           | 495 (7.6%)        |
| Other Hispanic                             | 325 (5.0%)        |
| Non-Hispanic White                         | 4603 (71.0%)      |
| Non-Hispanic Black                         | 661 (10.2%)       |
| Other Race                                 | 398 (6.1%)        |
| Income-Poverty Ratio                       | 3.2 (1.6, 5)      |
| Education Level                            |                   |
| Less than 9 <sup>th</sup> Grade            | 284 (4.4)         |
| 9-11 <sup>th</sup> Grade                   | 659 (10.2)        |
| High School Grad./GED                      | 1435 (22.1)       |
| Some College or AA Degree                  | 2048 (31.6)       |
| College Graduate or Above                  | 2056 (31.7)       |
| BMI (kg/m <sup>2</sup> )                   | 27.9 (24.3, 32.7) |
| Parity (among women)                       |                   |
| 0                                          | 1587 (24.5%)      |
| 1                                          | 1007 (15.5%)      |
| 2 or more                                  | 3889 (60.0%)      |
| PFOA (ng/ml)                               | 2.8 (1.8, 4.5)    |
| PFOS (ng/ml)                               | 9.1 (5.0, 15.9)   |
| PFNA (ng/ml)                               | 0.9 (0.6, 1.4)    |
| Smoking                                    |                   |
| Never [<100 lifetime cigarettes]           | 3549 (54.8%)      |
| Former [not current smoker]                | 1591 (24.5%)      |
| Smoker [< 1 pack per day]                  | 860 (13.3%)       |
| Heavy Smoker [ $\geq$ 1 pack per day]      | 481 (7.4%)        |
| Alcohol Use                                |                   |
| Never [<12 lifetime drinks]                | 647 (10.0%)       |
| Former [0 drinks last 12 months]           | 977 (15.1%)       |
| Light Drinker [<1 drink per week]          | 2045 (31.5%)      |
| Drinker [<7 drinks per week]               | 1751 (27.0%)      |
| Heavy Drinker [ $\geq$ 7 drinks per week]  | 1063 (16.4%)      |
| Dietary Intake                             |                   |
| Crude Dietary Fiber (g/day) <sup>b</sup>   | 15.4 (10.9, 21.8) |
| Energy Adjusted Fiber (g/day) <sup>b</sup> | 14.4 (10.8, 19.1) |
| Total Energy Intake (kcal/day)             | 2000 (1563, 2588) |

166 <sup>a</sup> Sampling parameters were used in calculating the above values.

167 <sup>b</sup> Dietary fiber was log-transformed for energy adjustment. The geometric mean crude dietary fiber was  
 168 14.5 g/day and for energy-adjusted fiber was 14.2 g/day.

169 Energy-adjusted dietary fiber was correlated with all the other dietary intake variables, based on  
 170 statistical significance (Table 2). In terms of the magnitude of the correlation, Fish & Shellfish had the  
 171 largest correlation (positive), followed by Meat & Meat products (negative) and Popcorn (positive).  
 172 Popcorn is a source of dietary fiber, so a positive correlation was expected. Seafood and meat do not  
 173 contain fiber, so the correlations with fiber must be due to differences in the overall diet of frequent  
 174 seafood and meat consumers.

175 **Table 2.** Partial correlation coefficients between dietary fiber and food intake variables.<sup>†</sup>

| Food                                  | Dietary Fiber |
|---------------------------------------|---------------|
| Fish & Shellfish (freq. last 30 days) | 0.13          |
| Meat & Meat Products (g/day)          | -0.10         |
| Milk & Dairy Products (g/day)         | 0.06          |
| Egg & Egg Products (g/day)            | -0.04         |
| Popcorn (g/day)                       | 0.07          |

176 <sup>†</sup> Each partial correlation coefficient was adjusted for energy intake as well as the other food intake  
 177 variables in this table. All partial correlation coefficients had p-value < 0.001.

178 In both the unadjusted and adjusted models of lnPFAS, the percent difference per IQR increment  
 179 in energy-adjusted dietary fiber was inverse for all three compounds (Table 3). Comparing the unadjusted  
 180 and adjusted results, addition of potentially confounding variables decreased the magnitude of association  
 181 for PFOA, slightly decreased it for PFOS, and increased the magnitude of the association for PFNA. In  
 182 the adjusted analyses, PFNA had the strongest association, followed by PFOS and PFOA. Only the  
 183 model of PFNA was improved by the addition of a quadratic term for energy-adjusted fiber. Eliminating  
 184 covariates whose inclusion had a small effect on the  $\beta$  for dietary fiber resulted in in energy intake, dairy,  
 185 eggs, income to poverty ratio and smoking being removed from the PFOA model, energy intake, meat,  
 186 dairy, eggs, popcorn, income to poverty ratio, parity, wave<sup>2</sup> and alcohol being removed from the PFOS  
 187 model, and energy intake, dairy, eggs, popcorn, income to poverty ratio, parity and alcohol being  
 188 removed from the PFNA model. The coefficients for all terms included in the final models are shown in  
 189 Tables S3-S5.

190 **Table 3.** Percent change in PFAS level per interquartile distance (IQR) increase in energy-adjusted fiber  
 191 intake using three different models.<sup>†</sup>

|  | Percent Change (95% CI) |
|--|-------------------------|
|--|-------------------------|

| PFAS (ng/mL) | Crude Model           | Full Model            | Final model           |
|--------------|-----------------------|-----------------------|-----------------------|
| PFOA         | -5.44 (-8.20, -2.60)  | -3.80 (-6.28, -1.26)  | -3.64 (-6.15, -1.07)  |
| PFOS         | -7.28 (-10.76, -3.67) | -6.73 (-9.58, -3.80)  | -6.69 (-9.57, -3.73)  |
| PFNA         | -6.45 (-9.48, -3.32)  | -8.07 (-10.66, -5.40) | -8.36 (-11.33, -5.29) |

192 † The full model was adjusted for energy intake, consumption of meat and meat products, milk and dairy  
193 products, eggs, popcorn, fish and shellfish, age, BMI, income to poverty ratio, education, parity (in  
194 women), sex, NHANES wave, smoking, alcohol, and race/ethnicity. The final model was based on the set  
195 of adjustment variables which gave a % change in PFAS that was < 5% different from that in the full  
196 model. For PFOA, energy intake, dairy, eggs, income to poverty ratio and smoking were removed. For  
197 PFOS, energy intake, meat, dairy, eggs, popcorn, income to poverty ratio, parity, wave<sup>2</sup> and alcohol were  
198 removed compared to the full model. For PFNA, energy intake, dairy, eggs, popcorn, income to poverty  
199 ratio, parity and alcohol were removed compared to the full model.

200 Examination of the percent difference in PFAS by quartile of fiber showed a roughly linear  
201 relationship for PFOS and PFNA (Figure 1). For PFOA, the highest quartile had a smaller percent  
202 difference than would be consistent with a linear relationship. This may represent some type of saturation  
203 of binding at higher fiber levels, though the quadratic model did not provide a substantially better fit to  
204 the data.

205 **Figure 1.** Percent change in PFAS by quartile of energy-adjusted dietary fiber.<sup>†</sup>

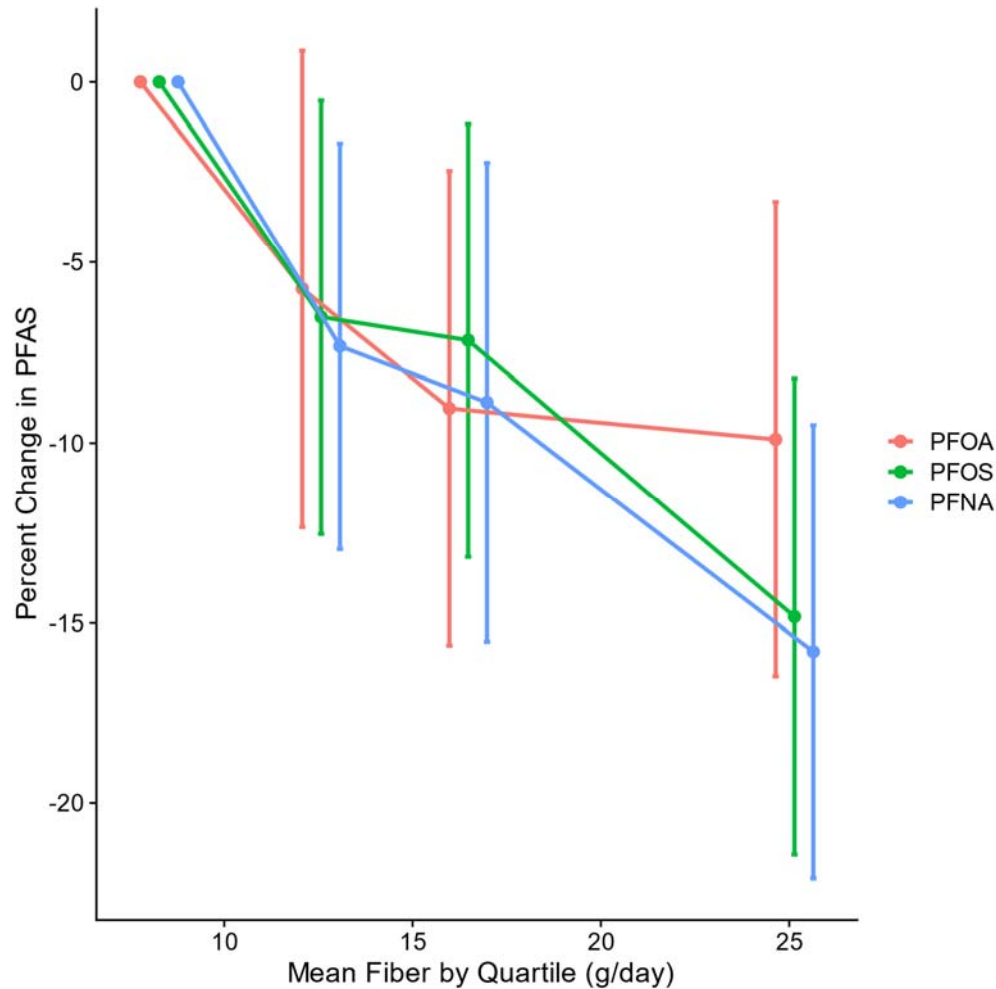

206

207 <sup>†</sup> Energy adjusted mean fiber values by quartile were 8.27, 12.6, 16.5, and 25.1 g/day.

208 The effect modification analysis showed interaction for age (PFOA and PFNA), BMI (all three  
209 PFAS), energy intake (PFOS), smoking category (PFOS and PFNA), alcohol category (PFOS), and  
210 NHANES wave (PFOA) (Tables S6 and S7a-c). Fiber associations decreased with age (PFOA and  
211 PFNA). Fiber associations decreased with BMI for PFOA; for PFOS and PFNA the trend was in the  
212 opposite direction and for PFNA, was of smaller magnitude. The association with fiber increased with  
213 energy intake (PFOS). Heavy smokers [ $\geq 1$  pack per day average] showed no decrease in PFOS or PFNA  
214 with higher fiber intake. The fiber associations in later waves were less inverse (PFOA and PFNA). The  
215 inverse association with fiber was largest for never, light and moderate drinkers (PFOS). Although  
216 differences in the PFAS-fiber association by sex did not meet our criterion for statistical significance, the

217 sex-stratified results suggested that the association for PFOA and PFOS was more inverse among females  
218 (Table S8).

219 For PFOA the analysis of type of food contributing fiber did not support important differences in  
220 association, based on the AIC's of the models (Table S9). The PFOS-fiber association was most inverse  
221 for fiber from the fruit food group. The PFNA model also supported differences by fiber source; in this  
222 case fruit and grain-based mixed dishes had the most inverse relations. When we examined associations  
223 with g/d of food from fiber containing foods, for PFOA, the model comparison supported a difference  
224 among food sources, and the food category highest in fiber (plant-based protein foods, which includes  
225 beans) had the most inverse relation (Table S10). Note that for PFOA, the g/d fiber models fit better than  
226 the g/d food models. For PFNA, the g/d food results were like those for PFOA. For PFOS, the g/d food  
227 models did not support a difference by food groups, and the total g/d food model fit better than the total  
228 g/d fiber model. Multiple imputation showed little difference from the complete case analysis (Table  
229 S11).

230 The measurement error-adjusted estimates for total fiber, as expected, were more inverse than  
231 those shown in Table 3 (supplemental information, section 1). The adjusted estimates were more inverse  
232 by 75% for PFOA, 82% for PFOS, and 53% for PFNA. When intake of crude fiber was modeled instead  
233 of energy-adjusted fiber, the results for crude fiber were similar (Table S12).

234

## 235 **Discussion**

236 For all three PFAS examined, higher intake of dietary fiber was associated with lower PFAS  
237 concentrations in serum. Although the associations were of modest size (less than 10% decrease in PFAS  
238 with IQR increase in dietary fiber), they may be important in the context of outcome-PFAS associations  
239 that themselves are of modest size, for which unmeasured confounding may have an important influence  
240 on the results.

241 In 13 previous reports with information about serum PFAS concentrations in relation to dietary  
242 factors, the focus was primarily on foods that might increase blood levels (Arrebola et al., 2018; Averina  
243 et al., 2018; Brantsaeter et al., 2013; Christensen et al., 2017; Eriksen et al., 2011; Halldorsson et al.,  
244 2008; Jain, 2014; Liu et al., 2017; Park et al., 2019; Skuladottir et al., 2015; Sun et al., 2018; Wu et al.,  
245 2015; Zhou et al., 2019). Dietary fiber was not examined in these studies, although associations of PFAS  
246 with intake of fiber-rich foods such as fruits, vegetables, beans, and cereal were considered by many. In a  
247 more recent study, Lin et al. examined both dietary patterns and energy-adjusted fiber intake directly and  
248 found high fiber diet patterns and fiber were associated with lower levels of several PFAS (Lin et al.,  
249 2020). Relevant to the interpretation of the data on foods is that energy intake is an expected confounder  
250 of the PFAS-fiber relationship and without adjustment an inverse association would be harder to detect.  
251 Adjustment for energy intake was done in three the of previous studies (Brantsaeter et al., 2013; Lin et al.,  
252 2020; Skuladottir et al., 2015). Despite the lack of energy intake adjustment in most of the previous  
253 studies that examined associations of PFAS with fiber-rich foods, the results were generally consistent  
254 with an inverse relation. In a study based on the Danish National Birth Cohort (Halldorsson et al., 2008),  
255 PFOA and PFOS were inversely related to intake of vegetables, and PFOS was inversely related to intake  
256 of fruits. In a study of 2003-2008 NHANES subjects (Jain, 2014), PFOA was inversely related to intake  
257 of beans, despite using only one diet record per subject, which would decrease the ability to detect a  
258 relation. In a study done in Singapore (Liu et al., 2017), PFOA and PFOS were inversely related to  
259 grains, and PFOS was inversely related to soy products. In another study done in Denmark (Skuladottir et  
260 al., 2015), PFOA and PFOS were inversely related to vegetable intake. In the Nurses' Health Study (Sun  
261 et al., 2018), an index of healthy eating, which was likely correlated with fiber intake, was related to  
262 lower PFOS. In a study done in California (Wu et al., 2015), PFOS concentration was inversely related to  
263 intake of crackers (excluding graham crackers). Popcorn was the only high-fiber food with a positive  
264 relation (Park et al., 2019; Sun et al., 2018), probably because the packaging for some popcorn products  
265 was a source of exposure (Sinclair et al., 2007).

266           The analysis of the PFAS-fiber association according to fiber source indicated that fiber's inverse  
267 association with PFOS and PFNA varied across food groups (Table S10). These analyses suggested that  
268 fruit fiber was especially important. For PFOA, no such specificity was indicated. A variety of fiber  
269 sources may be important. Although the g/d fiber models fit the data better than the models of g/d food  
270 from fiber-rich food groups for PFOA and PFNA, for PFOS this was not the case. Perhaps the g/d food  
271 model fit better for PFOS because it did a better job of capturing PFOS exposure from food packaging  
272 material (Susmann et al., 2019). The broad soluble/insoluble fiber dichotomy once used has been  
273 declared obsolete by the National Academy of Sciences, and for that reason even this breakdown has not  
274 been implemented in the USDA database on which the NHANES nutrient information was based (Slavin,  
275 2003).

276           The effect modification analysis identified no factor that similarly altered the PFAS-fiber  
277 association across all three PFAS. Age, BMI, and smoking, however, did similarly alter the association  
278 for at least two PFAS. The obese tend to underreport energy intake and distort reporting of dietary  
279 composition (Heitmann et al., 1995; Lissner et al., 2007). The net effect could be over-reporting of fiber  
280 intake among the obese. In other words, the true fiber intake among the obese could be less than reported,  
281 giving the appearance of a diminished fiber effect. Age-related differences in the accuracy of reported  
282 diet could similarly distort our results (Krok-Schoen et al., 2019). Given the limited evidence pointing to  
283 specific food sources of fiber as being important, co-variation in fiber type consumed with heavy  
284 smoking, age or BMI appears to be less well supported as an explanation for the effect modification but is  
285 still possible.

286           As noted earlier, dietary fiber decreases absorption of several constituents of food such as  
287 cholesterol, fat, and iron (Grube et al., 2013; Hallberg and Hulthén, 2000; Jesch and Carr, 2017). Dietary  
288 fiber decreases absorption by adsorbing substances and trapping them in a viscous gel matrix (Naumann  
289 et al., 2019). The association between dietary fiber and PFAS may be due to a similar underlying  
290 mechanism.

291           Although PFAS enters the gut by consuming food and drinking water that contain it, PFAS also  
292 enters the gut in bile that is excreted as part of enterohepatic circulation. This has been shown through  
293 measurement of PFOA and PFOS in bile at concentrations similar to those found in serum (Harada et al.,  
294 2007), and identification of many of the transporters that facilitate their enterohepatic circulation (Zhao et  
295 al., 2017, 2015). PFAS entering the gut through bile would be subject to the same effects of dietary fiber,  
296 i.e. decreased reabsorption, as PFAS from food. An analogous effect occurs with ingestion of  
297 cholestyramine, a bile acid sequestrant that also binds to selected drugs and nutrients (Davies, 1998;  
298 Pieroni and Fisher, 1981; West and Lloyd, 1975), which has been shown to increase excretion in human  
299 feces of all three PFAS we studied (Genuis et al., 2010). In that case study, excretion of PFOS and PFNA  
300 were increased to a greater degree than for PFOA (Genuis et al., 2010). Because we examined a small  
301 number of PFAS compounds, our ability to make inferences about the relationship of structure to fiber-  
302 enhanced gastrointestinal excretion was limited. Nonetheless, our results suggest that for fiber-enhanced  
303 excretion, alkyl chain length may be more important than the attached functional group.

304           Fiber intake may be an important unmeasured confounder affecting epidemiologic associations  
305 between serum cholesterol and serum PFAS, as mentioned previously. Fiber decreases serum cholesterol  
306 (Brown et al., 1999), and appears to lower serum PFAS. Some epidemiologic associations between  
307 serum cholesterol and serum PFAS could be attenuated by adjustment for fiber intake. Binding of fiber to  
308 PFAS that is in the gut due to enterohepatic circulation could account for confounding in some studies  
309 where PFAS exposure is primarily via drinking water or occupation (Steenland et al., 2009; Costa et al.,  
310 2009). Fiber could also be a confounder in epidemiologic associations between immunogenicity and  
311 PFAS. Fiber intake in the form of prebiotic supplements has been shown in randomized clinical trials to  
312 increase antibody titers following influenza vaccination (Yeh et al., 2018). If fiber increases antibody  
313 response to vaccines, and also decreases PFAS, this could account for some of the inverse association of  
314 antibody response with PFAS in epidemiologic data, but not the immune toxicity in experimental data  
315 (Liu et al., 2020; McDonough et al., 2020). The method of quantifying dietary fiber used for the USDA  
316 database underlying NHANES 2005-2016 did not include prebiotic dietary fiber as a separate category



317 from total dietary fiber (Phillips et al., 2019). Total dietary fiber, however, did capture dietary  
318 constituents that -- like prebiotics -- increase the production of short chain fatty acids, which have  
319 favorable effects on systemic antibody response (Carlson et al., 2018; Kim et al., 2016). Assessing the  
320 degree to which these associations are confounded by fiber will not be easy given the difficulty of  
321 measuring diet well. For example, if we had examined the cholesterol-PFAS association after adjusting  
322 for fiber intake and other potential confounders in the NHANES data, measurement error in the estimated  
323 usual fiber intake would lead to an overestimate of the association due to residual confounding.  
324 Specialized methods that account for the measurement error would be needed to estimate an  
325 unconfounded association.

326         Because our assessment of diet was based on two 24-hour diet recalls and because of the day-to-  
327 day variation in diet, we had an imprecise measure of usual intake for each subject. Imprecision in the  
328 fiber measure means that the associations with PFAS we observed were attenuated. We estimated the  
329 effect of imprecision on the associations by taking the correlation between the two energy-adjusted fiber  
330 intakes for each subject into account; this suggested that the estimates for the fiber “effect” would have  
331 been more than 70% larger for PFOA and PFOS in the absence of imprecision (supplemental information,  
332 section 1). The imprecision also applied to the dietary confounders, meaning that the fiber estimate might  
333 have been influenced by residual confounding. For example, meat was directly associated with PFOA  
334 (Table S1) and was inversely associated with fiber (Table 2). Failure to measure meat intake precisely  
335 means that the PFAS-fiber association would appear to be more inverse than in fact (Mehio-Sibai et al.,  
336 2005). Although meat was not a statistically significant determinant of serum PFOA, the possibility  
337 exists that the estimates in Table 3 were larger on an absolute scale than in fact. For the other dietary  
338 confounders, based on the sign of their relation with fiber and with PFOA, the residual confounding  
339 would have caused an estimate for fiber that was biased towards the null. What the overall effect of the  
340 residual confounding was remains uncertain. Another level of uncertainty arose from the inaccuracy in  
341 24-hour diet recalls (Karvetti and Knuts, 1985), which would have added to the imprecision and could  
342 have biased the results. Despite the difficulty incurred by use of a dietary measure, we were able to detect

343 the modest associations, possibly because of the large sample size, and the precision of the PFAS assays.  
344 Nonetheless, confirmation of the PFAS-fiber association in large studies with a comprehensive diet  
345 assessment and data analysis would increase confidence.

346

### 347 **Conclusion**

348         These results suggest that dietary fiber increases the gastrointestinal excretion of PFOA, PFOS,  
349 and PFNA in humans. Although the size of the associations was modest (less than 10% difference in  
350 PFAS with IQR difference in dietary fiber), the findings may be important in the context of studies of  
351 health outcomes in relation to PFAS if those health outcomes are also related to dietary fiber intake and  
352 the outcome-PFAS association is also modest.

353

354

355 6. Declaration of competing interest

356

357 3M, the company that funded this research, previously used PFOA and precursors to PFOS in  
358 manufacturing. 3M was not involved in the preparation of the manuscript. The authors retained sole  
359 control of the manuscript content and the findings, and statements in this paper are those of the authors  
360 and not those of the author's employer or the sponsors. No authors were directly compensated by 3M.  
361 This project was funded through a contract between 3M and Ramboll, an international science and  
362 engineering company that provided salary compensation to the authors. None of the authors are currently  
363 engaged to testify as experts on behalf of the sponsors in litigation related to the compound discussed in  
364 this manuscript.

365

366 CRediT authorship contribution statement

367

368 Michael W. Dzierlenga: Methodology, Software, Investigation, Writing – original draft & editing.

369 Debra R. Keast: Methodology, Writing – review and editing.

370 Matthew P. Longnecker: Conceptualization, Funding acquisition, Methodology, Writing - review &  
371 editing.

372

373

374

- 375 **References**
- 376 Akaike, H., 1974. A new look at the statistical model identification. *IEEE Transactions on Automatic*  
377 *Control* 19, 716–723. <https://doi.org/10.1109/TAC.1974.1100705>Arrebola, J.P., Castaño, A.,  
378 Esteban, M., Bartolomé, M., Pérez-Gómez, B., Ramos, J.J., ES, B., 2018. Differential  
379 contribution of animal and vegetable food items on persistent organic pollutant serum  
380 concentrations in Spanish adults. Data from BIOAMBIENT. ES project. *Science of The Total*  
381 *Environment* 634, 235–242.
- 382 Averina, M., Brox, J., Huber, S., Furberg, A.-S., 2018. Perfluoroalkyl substances in adolescents in  
383 northern Norway: lifestyle and dietary predictors. *The Tromsø study, Fit Futures 1. Environment*  
384 *international* 114, 123–130.Brantsaeter, A.L., Whitworth, K.W., Ydersbond, T.A., Haug, L.S.,  
385 Haugen, M., Knutsen, H.K., Thomsen, C., Meltzer, H.M., Becher, G., Sabaredzovic, A., 2013.  
386 Determinants of plasma concentrations of perfluoroalkyl substances in pregnant Norwegian  
387 women. *Environment international* 54, 74–84.
- 388 Brown, L., Rosner, B., Willett, W.W., Sacks, F.M., 1999. Cholesterol-lowering effects of dietary fiber: a  
389 meta-analysis. *Am J Clin Nutr* 69, 30–42. <https://doi.org/10.1093/ajcn/69.1.30>
- 390 Buck, R.C., Franklin, J., Berger, U., Conder, J.M., Cousins, I.T., De Voogt, P., Jensen, A.A., Kannan, K.,  
391 Mabury, S.A., van Leeuwen, S.P., 2011. Perfluoroalkyl and polyfluoroalkyl substances in the  
392 environment: terminology, classification, and origins. *Integr Environ Asses* 7, 513–541.
- 393 Buuren, S. van, Groothuis-Oudshoorn, K., 2011. mice: Multivariate Imputation by Chained Equations in  
394 R. *Journal of Statistical Software* 45, 1–67. <https://doi.org/10.18637/jss.v045.i03>
- 395 Carlson, J.L., Erickson, J.M., Lloyd, B.B., Slavin, J.L., 2018. Health effects and sources of prebiotic  
396 dietary fiber. *Current developments in nutrition* 2, nzy005.
- 397 Centers for Disease Control and Prevention (CDC) National Center for Health Statistics (NCHS), 2015.  
398 National Health and Nutrition Examination Survey Data. U.S. Department of Health and Human  
399 Services, Centers for Disease Control and Prevention, Hyattsville, MD.
- 400 Christensen, K.Y., Raymond, M., Blackowicz, M., Liu, Y., Thompson, B.A., Anderson, H.A., Turyk, M.,  
401 2017. Perfluoroalkyl substances and fish consumption. *Environmental research* 154, 145–151.
- 402 Costa, G., Sartori, S., Consonni, D., 2009. Thirty Years of Medical Surveillance in Perfluorooctanoic Acid  
403 Production Workers. *Journal of Occupational and Environmental Medicine* 51 (3), 364-  
404 372.Davies, N.M., 1998. Clinical pharmacokinetics of ibuprofen. *Clinical pharmacokinetics* 34,  
405 101–154.
- 406 Domingo, J.L., Jogsten, I.E., Eriksson, U., Martorell, I., Perelló, G., Nadal, M., van Bavel, B., 2012.  
407 Human dietary exposure to perfluoroalkyl substances in Catalonia, Spain. Temporal trend. *Food*  
408 *chemistry* 135, 1575–1582.
- 409 Dong, Z., Wang, H., Yu, Y.Y., Li, Y.B., Naidu, R., Liu, Y., 2019. Using 2003–2014 US NHANES data to  
410 determine the associations between per- and polyfluoroalkyl substances and cholesterol: Trend  
411 and implications. *Ecotoxicology and environmental safety* 173, 461–468.
- 412 EFSA CONTAM Panel, 2020. Risk to human health related to the presence of perfluorooctane sulfonic  
413 acid and perfluorooctanoic acid in food. *EFSA journal* 18 (9), 6223
- 414 EFSA CONTAM Panel, 2018. Risk to human health related to the presence of perfluorooctane sulfonic  
415 acid and perfluorooctanoic acid in food. *EFSA journal* 16, e05194.
- 416 Ellegård, L., Andersson, H., 2007. Oat bran rapidly increases bile acid excretion and bile acid synthesis:  
417 an ileostomy study. *European journal of clinical nutrition* 61, 938–945.
- 418 Ericson, I., Martí-Cid, R., Nadal, M., Van Bavel, B., Lindström, G., Domingo, J.L., 2008. Human  
419 exposure to perfluorinated chemicals through the diet: intake of perfluorinated compounds in  
420 foods from the Catalan (Spain) market. *Journal of agricultural and food chemistry* 56, 1787–1794.
- 421 Eriksen, K.T., Sørensen, M., McLaughlin, J.K., Tjønneland, A., Overvad, K., Raaschou-Nielsen, O.,  
422 2011. Determinants of plasma PFOA and PFOS levels among 652 Danish men. *Environmental*  
423 *science & technology* 45, 8137–8143.

- 424 Food Surveys Research Group, Agricultural Research Service, USDA, 2018. Food and Nutrient Database  
425 for Dietary Studies.
- 426 Geiger, S.D., Xiao, J., Ducatman, A., Frisbee, S., Innes, K., Shankar, A., 2014. The association between  
427 PFOA, PFOS and serum lipid levels in adolescents. *Chemosphere* 98, 78–83.
- 428 Genuis, S.J., Birkholz, D., Ralitsch, M., Thibault, N., 2010. Human detoxification of perfluorinated  
429 compounds. *Public health* 124, 367–375.
- 430 Grube, B., Chong, P.-W., Lau, K.-Z., Orzechowski, H.-D., 2013. A natural fiber complex reduces body  
431 weight in the overweight and obese: A double-blind, randomized, placebo-controlled study.  
432 *Obesity* 21, 58–64.
- 433 Hallberg, L., Hulthén, L., 2000. Prediction of dietary iron absorption: an algorithm for calculating  
434 absorption and bioavailability of dietary iron. *The American Journal of Clinical Nutrition* 71,  
435 1147–1160.
- 436 Halldorsson, T.I., Fei, C., Olsen, J., Lipworth, L., McLaughlin, J.K., Olsen, S.F., 2008. Dietary predictors  
437 of perfluorinated chemicals: a study from the Danish National Birth Cohort. *Environmental*  
438 *science & technology* 42, 8971–8977.
- 439 Harada, K.H., Hashida, S., Kaneko, T., Takenaka, K., Minata, M., Inoue, K., Saito, N., Koizumi, A.,  
440 2007. Biliary excretion and cerebrospinal fluid partition of perfluorooctanoate and  
441 perfluorooctane sulfonate in humans. *Environmental toxicology and pharmacology* 24, 134–139.
- 442 Haug, L.S., Salihovic, S., Jogsten, I.E., Thomsen, C., van Bavel, B., Lindström, G., Becher, G., 2010.  
443 Levels in food and beverages and daily intake of perfluorinated compounds in Norway.  
444 *Chemosphere* 80, 1137–1143.
- 445 Heitmann, B.L., Lissner, L., Sørensen, T., Bengtsson, C., 1995. Dietary fat intake and weight gain in  
446 women genetically predisposed for obesity. *The American journal of clinical nutrition* 61, 1213–  
447 1217.
- 448 Hoy, M., Goldman, J., 2014. Fiber intake in the US population: What we eat in America, NHANES 2009-  
449 2010. What we eat in America, NHANES 12, 1–6.
- 450 Interstate Technology Regulatory Council (ITRC), 2020. History and Use of Per- and Polyfluoroalkyl  
451 Substances (PFAS). ITRC, Washington, DC.
- 452 Jain, R.B., 2014. Contribution of diet and other factors to the levels of selected polyfluorinated  
453 compounds: data from NHANES 2003–2008. *International journal of hygiene and environmental*  
454 *health* 217, 52–61.
- 455 Jesch, E.D., Carr, T.P., 2017. Food ingredients that inhibit cholesterol absorption. *Preventive nutrition*  
456 *and food science* 22, 67.
- 457 Karvetti, R.L., Knuts, L.R., 1985. Validity of the 24-hour dietary recall. *Journal of the American Dietetic*  
458 *Association* 85, 1437–1442.
- 459 Kim, M., Qie, Y., Park, J., Kim, C.H., 2016. Gut microbial metabolites fuel host antibody responses. *Cell*  
460 *host & microbe* 20, 202–214.
- 461 Krok-Schoen, J.L., Jonnalagadda, S.S., Luo, M., Kelly, O.J., Taylor, C.A., 2019. Nutrient Intakes from  
462 Meals and Snacks Differ with Age in Middle-Aged and Older Americans. *Nutrients* 11, 1301.
- 463 Lee, S.C., Prosky, L., De Vries, J.W., 1992. Determination of total, soluble, and insoluble dietary fiber in  
464 foods-enzymatic-gravimetric method, MES-TRIS buffer: collaborative study. *Journal of AOAC*  
465 *International* 75, 395–416.
- 466 Lin, P. D., Cardenas, A., Hauser, R., Gold, D. R., Kleinman, K. P., Hivert, M.-F., Fleisch, A. F., Calafat,  
467 A. M., Sanchez-Guerra, M., Osorio-Yáñez, C., Webster, T. F., Horton, E. S., Oken, E., 2020.  
468 Dietary characteristics associated with plasma concentrations of per- and polyfluoroalkyl  
469 substances among adults with pre-diabetes: Cross-sectional results from the Diabetes Prevention  
470 Program Trail. *Environment International* 137, 105217.
- 471 Lissner, L., Troiano, R., Midthune, D., Heitmann, B., Kipnis, V., Subar, A., Potischman, N., 2007. OPEN  
472 about obesity: recovery biomarkers, dietary reporting errors and BMI. *International journal of*  
473 *obesity* 31, 956–961.

- 474 Liu, J., Liu, S., Huang, Z., Fu, Y., Fei, J., Liu, X., He, Z., 2020. Associations between the serum levels of  
475 PFOS/PFOA and IgG N-glycosylation in adult or children 265, 114285.
- 476 Liu, Y., Su, J., van Dam, R.M., Prem, K., Hoong, J.Y., Zou, L., Lu, Y., Ong, C.N., 2017. Dietary  
477 predictors and plasma concentrations of perfluorinated alkyl acids in a Singapore population.  
478 *Chemosphere* 171, 617–624.
- 479 Lumley, T., 2019a. survey: analysis of complex survey samples.
- 480 Lumley, T., 2019b. mitools: tools for multiple imputation of missing data. [WWW Document]. URL  
481 <https://cran.r-project.org/web/packages/mitools/> (accessed 4.29.20).
- 482 Lumley, T., 2004. Analysis of complex survey samples. *Journal of Statistical Software* 9, 1–19.
- 483 McDonough, C., Ward, C., Hu, Q., Vance, S., Higgins, C., DeWitt, J., 2020. Immunotoxicity of an  
484 Electrochemically Fluorinated Aqueous Film-Forming Foam 178(1), 104-114.
- 485 Mehio-Sibai, A., Feinleib, M., Sibai, T.A., Armenian, H.K., 2005. A positive or a negative confounding  
486 variable? A simple teaching aid for clinicians and students. *Annals of epidemiology* 15, 421–423.
- 487 Naumann, S., Schweiggert-Weisz, U., Eglmeier, J., Haller, D., Eisner, P., 2019. In Vitro interactions of  
488 dietary fibre enriched food ingredients with primary and secondary bile acids. *Nutrients* 11, 1424.
- 489 Nelson, J.W., Hatch, E.E., Webster, T.F., 2010. Exposure to polyfluoroalkyl chemicals and cholesterol,  
490 body weight, and insulin resistance in the general US population. *Environmental health  
491 perspectives* 118, 197–202.
- 492 Noorlander, C.W., Van Leeuwen, S.P., Te Biesebeek, J.D., Mengelers, M.J., Zeilmaker, M.J., 2011.  
493 Levels of perfluorinated compounds in food and dietary intake of PFOS and PFOA in the  
494 Netherlands. *Journal of agricultural and food chemistry* 59, 7496–7505.
- 495 Park, S.K., Peng, Q., Ding, N., Mukherjee, B., Harlow, S.D., 2019. Determinants of per-and  
496 polyfluoroalkyl substances (PFAS) in midlife women: Evidence of racial/ethnic and geographic  
497 differences in PFAS exposure. *Environmental research* 175, 186–199.
- 498 Phillips, K.M., Haytowitz, D.B., Pehrsson, P.R., 2019. Implications of two different methods for  
499 analyzing total dietary fiber in foods for food composition databases. *Journal of Food  
500 Composition and Analysis* 84, 103253.
- 501 Pieroni, R.E., Fisher, J.G., 1981. Use of cholestyramine resin in digitoxin toxicity. *Jama* 245, 1939–1940.
- 502 R Core Team, 2018. R: A language and environment for statistical computing. R Foundation for  
503 Statistical Computing, Vienna, Austria.
- 504 Sinclair, E., Kim, S.K., Akinleye, H.B., Kannan, K., 2007. Quantitation of gas-phase perfluoroalkyl  
505 surfactants and fluorotelomer alcohols released from nonstick cookware and microwave popcorn  
506 bags. *Environmental science & technology* 41, 1180–1185.
- 507 Skuladottir, M., Ramel, A., Rytter, D., Haug, L.S., Sabaredzovic, A., Bech, B.H., Henriksen, T.B., Olsen,  
508 S.F., Halldorsson, T.I., 2015. Examining confounding by diet in the association between  
509 perfluoroalkyl acids and serum cholesterol in pregnancy. *Environmental research* 143, 33–38.
- 510 Slavin, J., 2003. Impact of the proposed definition of dietary fiber on nutrient databases. *Journal of Food  
511 Composition and Analysis* 16, 287–291.
- 512 Steenland, K., Tinker, S., Frisbee, S., Ducatman, A., Vaccarino, V., 2009. Association of  
513 perfluorooctanoic acid and perfluorooctane sulfonate with serum lipids among adults living near a  
514 chemical plant. *American journal of epidemiology* 170, 1268–1278.
- 515 Sun, Q., Zong, G., Valvi, D., Nielsen, F., Coull, B., Grandjean, P., 2018. Plasma concentrations of  
516 perfluoroalkyl substances and risk of type 2 diabetes: a prospective investigation among US  
517 women. *Environmental health perspectives* 126, 037001.
- 518 Sunderland, E.M., Hu, X.C., Dassuncao, C., Tokranov, A.K., Wagner, C.C., Allen, J.G., 2019. A review  
519 of the pathways of human exposure to poly-and perfluoroalkyl substances (PFASs) and present  
520 understanding of health effects. *J Expo Sci Env Epid* 29, 131–147.
- 521 Susmann, H. P., Schaidler, L. A., Rodgers, K. M., Rudel, R. A., 2019. Dietary Habits Related to Food  
522 Packaging and Population Exposure to PFASs. *Environmental Health Perspectives* 127(10),  
523 107003.



- 524 Tittlemier, S.A., Pepper, K., Seymour, C., Moisey, J., Bronson, R., Cao, X.-L., Dabeka, R.W., 2007.  
525 Dietary exposure of Canadians to perfluorinated carboxylates and perfluorooctane sulfonate via  
526 consumption of meat, fish, fast foods, and food items prepared in their packaging. *Journal of*  
527 *agricultural and food chemistry* 55, 3203–3210.
- 528 Vestergren, R., Cousins, I.T., 2013. Human dietary exposure to per-and poly-fluoroalkyl substances  
529 (PFASs), in: *Persistent Organic Pollutants and Toxic Metals in Foods*. Elsevier, pp. 279–307.
- 530 West, R., Lloyd, J., 1975. The effect of cholestyramine on intestinal absorption. *Gut* 16, 93–98.
- 531 Willett, W.C., Howe, G.R., Kushi, L.H., 1997. Adjustment for total energy intake in epidemiologic  
532 studies. *The American journal of clinical nutrition* 65, 1220S-1228S.
- 533 Wu, H., Yoon, M., Verner, M.-A., Xue, J., Luo, M., Andersen, M.E., Longnecker, M.P., Clewell III, H.J.,  
534 2015. Can the observed association between serum perfluoroalkyl substances and delayed  
535 menarche be explained on the basis of puberty-related changes in physiology and  
536 pharmacokinetics? *Environment international* 82, 61–68.
- 537 Yeh, T.-L., Shih, P.-C., Liu, S.-J., Lin, C.-H., Liu, J.-M., Lei, W.-T., Lin, C.-Y., 2018. The influence of  
538 prebiotic or probiotic supplementation on antibody titers after influenza vaccination: a systematic  
539 review and meta-analysis of randomized controlled trials. *Drug design, development and therapy*  
540 12, 217.
- 541 Zhao, W., Zitzow, J.D., Ehresman, D.J., Chang, S.-C., Butenhoff, J.L., Forster, J., Hagenbuch, B., 2015.  
542 Na<sup>+</sup>/taurocholate cotransporting polypeptide and apical sodium-dependent bile acid transporter  
543 are involved in the disposition of perfluoroalkyl sulfonates in humans and rats. *Toxicological*  
544 *Sciences* 146, 363–373.
- 545 Zhao, W., Zitzow, J.D., Weaver, Y., Ehresman, D.J., Chang, S.-C., Butenhoff, J.L., Hagenbuch, B., 2017.  
546 Organic anion transporting polypeptides contribute to the disposition of perfluoroalkyl acids in  
547 humans and rats. *Toxicological Sciences* 156, 84–95.
- 548 Zhou, W., Zhao, S., Tong, C., Chen, L., Yu, X., Yuan, T., Aimuzi, R., Luo, F., Tian, Y., Zhang, J., 2019.  
549 Dietary intake, drinking water ingestion and plasma perfluoroalkyl substances concentration in  
550 reproductive aged Chinese women. *Environment international* 127, 487–494.  
551
